# Supplementary material
Source: MDPI journal article supplement (https://www.mdpi.com/2305-6320/10/7/43)
Supplement: s1 [file s1]

# Supplementary Materials

## Figure S1.

Induction of neurite extension in PC-12 cells by NGF. PC-12 cells were detached by trypsinization and incubated for 2 days to achieve complete adherence. Adherent cells were then incubated for 0, 2, 5 and 7 days in serum-free medium containing 50 ng/ml NGF with addition of fresh NGF solution at day 3 and day 6, using overlay method previously described (24).

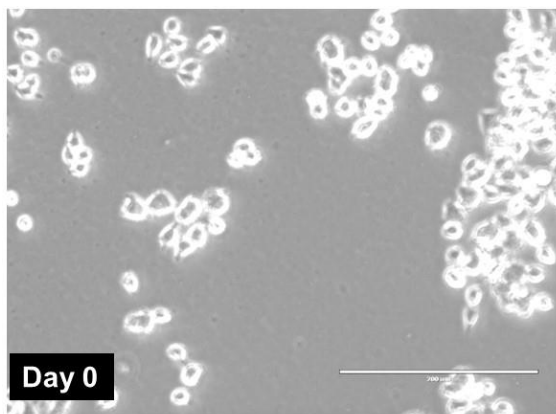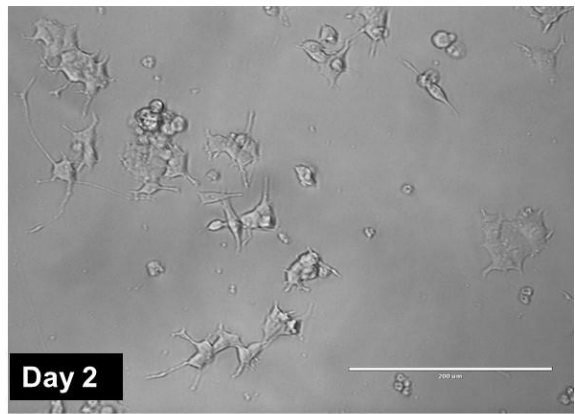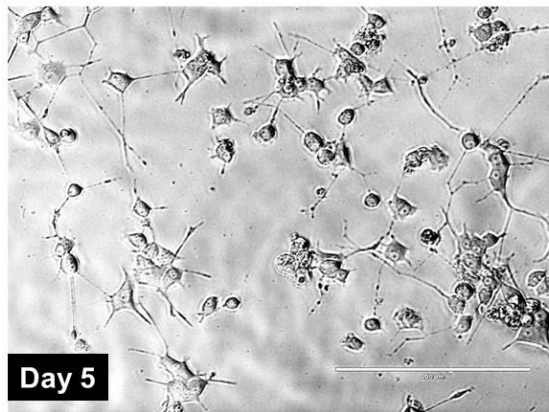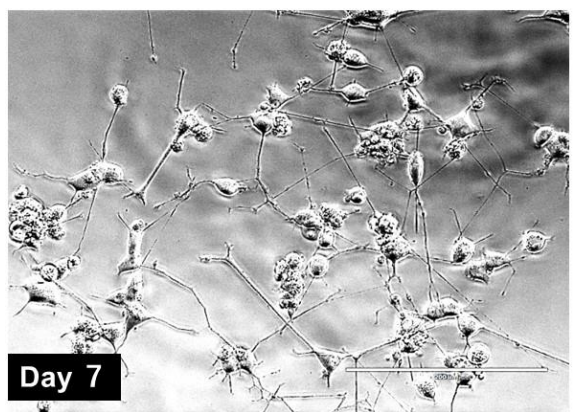

# Table S1 Tumor-specificity of newly synthesized 65 chromone derivatives

|                                    | CC <sub>50</sub> (μM)                         |       |       |       |             |                         |       |       |             |       | TS    |  |
|------------------------------------|-----------------------------------------------|-------|-------|-------|-------------|-------------------------|-------|-------|-------------|-------|-------|--|
|                                    | Human oral squamous cell carcinoma cell lines |       |       |       |             | Human normal oral cells |       |       |             |       |       |  |
|                                    | Ca9-22<br>(A)                                 | HSC-2 | HSC-3 | HSC-4 | mean<br>(B) | HGF<br>(C)              | HPLF  | HPC   | mean<br>(D) | (D/B) | (C/A) |  |
| A 2- Indolylchromes (Series A)     |                                               |       |       |       |             |                         |       |       |             |       |       |  |
| 1                                  | 4.1                                           | 9.4   | 3.1   | 4.6   | 5.3         | 320.0                   | 59.7  | 205.7 | 195.1       | 36.6  | 77.8  |  |
| 2                                  | 64.9                                          | 35.5  | 30.3  | 13.8  | 36.2        | 43.5                    | 16.8  | 29.5  | 29.9        | 0.8   | 0.7   |  |
| 3                                  | 75.1                                          | 62.5  | 157.0 | 70.6  | 91.3        | 269.7                   | 174.7 | 262.0 | 235.4       | 2.6   | 3.6   |  |
| 4                                  | 26.3                                          | 23.0  | 171.3 | 183.0 | 100.9       | 202.0                   | 60.0  | 148.3 | 136.8       | 1.4   | 7.7   |  |
| 5                                  | 8.6                                           | 5.9   | 8.2   | 16.9  | 9.9         | 88.6                    | 38.9  | 87.0  | 71.5        | 7.2   | 10.4  |  |
| 6                                  | 17.7                                          | 12.4  | 10.9  | 18.2  | 14.8        | 170.3                   | 167.0 | 163.7 | 167.0       | 11.3  | 9.6   |  |
| 7                                  | 6.3                                           | 30.1  | 29.8  | 52.8  | 29.7        | 272.3                   | 202.3 | 238.0 | 237.6       | 8.0   | 43.1  |  |
| 8                                  | 3.1                                           | 3.1   | 3.2   | 3.8   | 3.3         | 35.3                    | 10.5  | 10.9  | 18.9        | 5.7   | 11.4  |  |
| A                                  | 7.6                                           | 5.7   | 5.2   | 3.1   | 5.4         | 236.0                   | 68.8  | 75.4  | 126.7       | 23.5  | 31.2  |  |
| DXR                                | 0.35                                          | 0.09  | 0.11  | 0.08  | 0.16        | >10                     | >10   | 4.6   | >8.2        | >52.3 | >28.8 |  |
| Melphalan                          | 27.1                                          | 9.0   | 8.6   | 5.9   | 12.6        | >200                    | 186.0 | 165.0 | >184        | >14.5 | >7.4  |  |
| B Indole-Aurone hybrid (Series B)  |                                               |       |       |       |             |                         |       |       |             |       |       |  |
| 1                                  | 32.8                                          | 58.4  | 139.0 | 47.9  | 69.5        | 191.0                   | 172.7 | 172.4 | 178.7       | 2.6   | 5.8   |  |
| 2                                  | 135.7                                         | >400  | 337.9 | >400  | >318        | 379.5                   | 231.6 | 237.1 | 282.7       | <0.9  | 2.8   |  |
| 3                                  | >400                                          | 177.8 | 252.2 | >400  | >307        | 260.7                   | 123.5 | 179.1 | 187.8       | <0.6  | <0.7  |  |
| 4                                  | 48.0                                          | >400  | 319.7 | >400  | >292        | >400                    | 250.0 | 390.1 | >347        | ><1.2 | >8.3  |  |
| 5                                  | 128.3                                         | >400  | 295.5 | 49.8  | >218        | 388.4                   | >400  | >400  | >396        | ><1.8 | 3.0   |  |
| 6                                  | 79.7                                          | 83.6  | >400  | 172.9 | >184        | 260.5                   | 81.7  | 389.6 | 243.9       | ><1.3 | 3.3   |  |
| 7                                  | 95.0                                          | >400  | 72.5  | 43.2  | >153        | 279.7                   | 25.7  | 250.3 | 185.3       | <1.2  | 2.9   |  |
| 8                                  | >400                                          | >400  | >400  | >400  | >400        | >400                    | >400  | 261.6 | >354        | ><0.9 | ><1   |  |
| 9                                  | 83.4                                          | >400  | >400  | >400  | >321        | 364.9                   | 308.0 | >400  | >358        | ><1.1 | 4.4   |  |
| 10                                 | 21.7                                          | 10.5  | <3.13 | 10.1  | 11.3        | >400                    | >400  | >400  | >400        | >35.3 | >18.5 |  |
| DOX                                | 1.40                                          | 0.40  | 0.49  | 0.27  | 0.64        | >10                     | 8.1   | >10   | >9.4        | >14.6 | >7.2  |  |
| C Capsaicin derivatives (Series C) |                                               |       |       |       |             |                         |       |       |             |       |       |  |
| 1                                  | >400                                          | >400  |       |       | >400        | >400                    | >400  |       | >400        | ><1   | ><1   |  |
| 2                                  | >400                                          | >400  |       |       | >400        | >400                    | >400  |       | >400        | ><1   | ><1   |  |
| 3                                  | 154.2                                         | 178.9 |       |       | 166.6       | 387.9                   | 292.0 |       | 339.9       | 2.0   | 2.5   |  |
| 4                                  | 121.4                                         | 94.4  |       |       | 107.9       | >400                    | >400  |       | >400        | >3.7  | >3.3  |  |
| 5                                  | 95.0                                          | 73.2  |       |       | 84.1        | >400                    | >400  |       | >400        | >4.8  | >4.2  |  |
| 6                                  | 17.9                                          | 17.5  |       |       | 17.7        | >400                    | >400  |       | >400        | >22.6 | >22.3 |  |
| 7                                  | 14.8                                          | 10.6  |       |       | 12.7        | >400                    | >400  |       | >400        | >31.5 | >27.0 |  |
| 8                                  | 61.7                                          | 62.3  |       |       | 62.0        | 98.3                    | 93.2  |       | 95.8        | 1.5   | 1.6   |  |
| 9                                  | 31.8                                          | 17.4  |       |       | 24.6        | 167.7                   | 58.3  |       | 113.0       | 4.6   | 5.3   |  |
| 10                                 | 43.3                                          | 26.1  |       |       | 34.7        | 83.8                    | 78.8  |       | 81.3        | 2.3   | 1.9   |  |
| 11                                 | 140.9                                         | 131.0 |       |       | 136.0       | 282.9                   | 258.8 |       | 270.9       | 2.0   | 2.0   |  |
| 12                                 | >400                                          | >400  |       |       | >400        | 173.3                   | >400  |       | >286.7      | ><0.7 | <0.4  |  |
| 13                                 | >400                                          | >400  |       |       | >400        | 250.0                   | >400  |       | >325.0      | ><0.8 | <0.6  |  |
| 14                                 | 164.3                                         | 195.0 |       |       | 179.65      | 35.4                    | 200.0 |       | 117.7       | 0.7   | 0.2   |  |
| 15                                 | 71.7                                          | 70.8  |       |       | 71.25       | 5.8                     | 53.6  |       | 29.7        | 0.4   | 0.1   |  |
| 16                                 | 200.0                                         | >400  |       |       | >300        | 169.2                   | >400  |       | >285        | ><0.9 | 0.8   |  |
| 17                                 | >400                                          | >400  |       |       | >400        | 4.3                     | >400  |       | >202        | ><0.5 | <0.01 |  |
| 18                                 | >400                                          | >400  |       |       | >400        | 10.1                    | >400  |       | >205        | ><0.5 | <0.03 |  |
| 19                                 | 32.3                                          | 46.0  |       |       | 39.15       | 4.1                     | 26.1  |       | 15.1        | 0.4   | 0.1   |  |
| 20                                 | 23.1                                          | 10.9  |       |       | 17          | 18.2                    | 73.1  |       | 45.7        | 2.7   | 0.8   |  |
| 21                                 | 98.3                                          | 92.3  |       |       | 95.3        | 266.7                   | 305.9 |       | 286.3       | 3.0   | 2.7   |  |
| 22                                 | 144.7                                         | 189.7 |       |       | 167.2       | 43.1                    | 231.6 |       | 137.4       | 0.8   | 0.3   |  |
| 23                                 | 27.9                                          | 7.7   |       |       | 17.775      | 165.9                   | 135.9 |       | 150.9       | 8.5   | 5.9   |  |
| DXR                                | 0.32                                          | 0.08  |       |       | 0.2015      | >10                     | >10   |       | >10         | >49.6 | >31.2 |  |
| 5-FU                               | 72.9                                          | 150.0 |       |       | 111.45      | >1000                   | >1000 |       | >1000       | >9.0  | >13.7 |  |
| Cisplatin                          | 166.7                                         | 112.8 |       |       | 139.75      | 407.4                   | 385.4 |       | 396.4       | 2.8   | 2.4   |  |
| Melphalan                          | 35.6                                          | 12.1  |       |       | 23.84       | 171.7                   | 197.6 |       | 184.6       | 7.7   | 4.8   |  |

# Table S1 (continued)

|                                       | CC <sub>50</sub> (μM)                         |       |       |       |      |                         |       |       |        |       |        |
|---------------------------------------|-----------------------------------------------|-------|-------|-------|------|-------------------------|-------|-------|--------|-------|--------|
|                                       | Human oral squamous cell carcinoma cell lines |       |       |       |      | Human normal oral cells |       |       |        | TS    |        |
|                                       | Ca9-22                                        | HSC-2 | HSC-3 | HSC-4 | mean | HGF                     | HPLF  | HPC   | mean   |       |        |
|                                       | (A)                                           |       |       |       | (B)  | (C)                     |       |       | (D)    |       |        |
| D 6,7-Styrylchromones (Series D)      |                                               |       |       |       |      |                         |       |       |        |       |        |
| 1                                     | 25                                            | 19    | 117   | 22.7  | 45.9 | 164                     | >400  |       | >282   | >6.1  | 6.6    |
| 2                                     | 3.1                                           | 3.1   | 3.1   | 3.1   | 3.1  | 3.1                     | 10.4  |       | 6.8    | 2.2   | 1.0    |
| 3                                     | 3.1                                           | 3.1   | 4.5   | 3.1   | 3.5  | 3.1                     | 60    |       | 31.6   | 9.1   | 1.0    |
| 4                                     | 11.2                                          | 15.6  | 22.1  | 16.8  | 16.4 | 19.6                    | 83    |       | 51.3   | 3.1   | 1.8    |
| 5                                     | 3.9                                           | 3.1   | 14    | 4.2   | 6.3  | 3.1                     | >400  |       | >201.6 | >32.0 | 0.8    |
| 6                                     | 5.6                                           | 5.3   | 16    | 7.4   | 8.6  | 5.8                     | 79    |       | 42.4   | 4.9   | 1.0    |
| 7                                     | 13                                            | 14.3  | 22    | 18    | 16.8 | 19.1                    | 30    |       | 24.6   | 1.5   | 1.5    |
| 8                                     | 8.3                                           | 9.8   | 13    | 11    | 10.5 | 20.8                    | 27    |       | 23.9   | 2.3   | 2.5    |
| 9                                     | 3.6                                           | 3.1   | 4     | 5.4   | 4.0  | 4.6                     | 100   |       | 52.3   | 13.0  | 1.3    |
| 10                                    | 5.5                                           | 3.1   | 18.1  | 5.7   | 8.1  | 9.4                     | 100   |       | 54.7   | 6.8   | 1.7    |
| 11                                    | 3.4                                           | 3.1   | 7.2   | 5.2   | 4.7  | 3.1                     | 67    |       | 35.1   | 7.4   | 0.9    |
| 12                                    | 3.5                                           | 3.1   | 5.5   | 5.5   | 4.4  | 3.1                     | 92    |       | 47.6   | 10.8  | 0.9    |
| DXR                                   | 0.45                                          | 0.17  | 0.31  | 0.17  | 0.28 | 1.3                     | 6     |       | 3.7    | 13.3  | 2.9    |
| 5-FU                                  | 31                                            | 63    | 31    | 7.8   | 33.2 | >1000                   | 94    |       | >547   | >16.5 | >32.3  |
| Melphalan                             | 41                                            | 14.8  | 19    | 8.5   | 20.8 | 168                     | 186   |       | 177.0  | 8.5   | 4.1    |
| E 3-Benzylidenechromanones (Series E) |                                               |       |       |       |      |                         |       |       |        |       |        |
| 1                                     | 8.2                                           | 7.3   | 10.1  | 6.3   | 8.0  | 49.5                    | 20.4  | 17.0  | 29.0   | 3.6   | 6.0    |
| 2                                     | 11.1                                          | 11.5  | 13.3  | 10.7  | 11.7 | >400                    | 20.3  | 38.4  | >153   | >13.1 | >35.9  |
| 3                                     | 2.8                                           | 4.1   | 2.2   | 5.3   | 3.6  | >400                    | 96.2  | >400  | >299   | >82.6 | >141.6 |
| 4                                     | 6.6                                           | 7.7   | 6.3   | 8.9   | 7.4  | 49.5                    | 11.5  | 21.2  | 27.4   | 3.7   | 7.5    |
| 5                                     | 4.0                                           | 4.5   | 9.8   | 8.2   | 6.6  | 100.0                   | 363.6 | 28.1  | 163.9  | 24.8  | 25.2   |
| 6                                     | 31.3                                          | 40.3  | 44.6  | 43.1  | 39.8 | 87.5                    | 183.3 | 109.1 | 126.6  | 3.2   | 2.8    |
| 7                                     | 16.6                                          | 11.4  | 18.9  | 9.2   | 14.0 | >400                    | 86.2  | 213.3 | >233   | >16.6 | >24.2  |
| 8                                     | 6.0                                           | 5.3   | 7.5   | 6.3   | 6.3  | >400                    | 30.1  | 22.9  | >151   | >24.1 | >66.3  |
| 9                                     | 4.3                                           | 5.1   | 7.2   | 4.4   | 5.3  | >400                    | >400  | 37.5  | >279   | >53.1 | >93.5  |
| 10                                    | 5.1                                           | 4.9   | 7.2   | 4.7   | 5.5  | 20.5                    | 17.7  | 13.4  | 17.2   | 3.1   | 4.0    |
| 11                                    | 13.5                                          | 12.5  | 24.1  | 11.9  | 15.5 | 42.4                    | 144.4 | 21.9  | 69.6   | 4.5   | 3.1    |
| DOX                                   | 0.3                                           | 0.1   | 0.2   | 0.1   | 0.2  | 2.0                     | >10   | >10   | >7.3   | >48.9 | >6.7   |
| 5-FU                                  | 78.1                                          | 31.3  | 7.5   | 6.6   | 30.9 | >1000                   | >1000 | >1000 | >1000  | >37.9 | >19.4  |
| Cisplatin                             | 79.3                                          | 62.5  | 14.0  | 24.0  | 45.0 | 727.3                   | 219.3 | 108.9 | 351.8  | 7.8   | 9.2    |
| Melphalan                             | 40.8                                          | 14.0  | 16.7  | 11.1  | 20.6 | 192.5                   | >200  | >200  | >197   | >9.6  | >4.7   |

**Table S2: Search for signaling pathway involved in 3-styrylchromone Induced-induced selective tumor-specificity against human OSCC cell lines**

| Compound #                                                              | 1     | 2     | 3      | 4     | 5      | 6      | 7     | 8     | 9     | 10    | 11    | 12    | 13    | 14    |         |
|-------------------------------------------------------------------------|-------|-------|--------|-------|--------|--------|-------|-------|-------|-------|-------|-------|-------|-------|---------|
| T-N                                                                     | 0.373 | 0.062 | -0.159 | 0.523 | -0.164 | -0.001 | 2.373 | 0.566 | 0.501 | 0.522 | 0.190 | 0.862 | 0.503 | 2.086 | p-value |
| ERRPGC_ant (estrogen related receptor with PGC antagonist)              | N     | N     | N      | P     | N      | N      | P     | P     | P     | P     | P     | P     | P     | P     | 0.0307  |
| CAR_ant (constitutive androstane receptor antagonist)                   | N     | N     | N      | N     | N      | N      | N     | P     | N     | N     | N     | P     | N     | P     | 0.1385  |
| RAR_ant (retinoic acid receptor antagonist)                             | P     | N     | P      | N     | P      | N      | N     | N     | N     | N     | N     | N     | N     | N     | 0.1472  |
| ARant_ago (androgen receptor with antagonist agonist)                   | N     | N     | N      | N     | N      | N      | N     | N     | N     | P     | N     | N     | N     | P     | 0.1567  |
| TSHR_ago (thyroid stimulating hormone receptor agonist)                 | N     | N     | N      | N     | N      | N      | P     | N     | N     | N     | P     | P     | N     | N     | 0.1619  |
| H2AX_ago (histone variant H2AX agonist)                                 | N     | P     | N      | P     | P      | N      | P     | P     | N     | N     | N     | N     | N     | P     | 0.1825  |
| GR_ant (glucocorticoid receptor antagonist)                             | P     | P     | P      | N     | N      | N      | N     | N     | P     | N     | N     | N     | N     | N     | 0.2328  |
| TRHR_ago (thyrotropin releasing hormone receptor agonist)               | P     | P     | P      | N     | P      | N      | N     | P     | P     | P     | P     | N     | P     | P     | 0.2913  |
| TR_ant (thyroid receptor antagonist)                                    | P     | N     | P      | P     | P      | N      | P     | P     | P     | N     | P     | P     | P     | P     | 0.3295  |
| PPARG_ant (peroxisome proliferator-activated receptor gamma antagonist) | N     | N     | N      | N     | N      | N      | N     | N     | N     | N     | P     | P     | P     | P     | 0.3348  |
| CaspC_ind (caspase-3/7 in CHO-K1 inducer)                               | P     | N     | P      | N     | P      | N      | P     | P     | P     | N     | P     | P     | P     | P     | 0.3508  |
| HDAC_ant (histone deacetylase antagonist)                               | P     | P     | P      | P     | P      | N      | N     | P     | N     | N     | P     | N     | P     | P     | 0.3539  |
| TRHR_ant (thyrotropin releasing hormone receptor antagonist)            | N     | N     | N      | N     | N      | P      | N     | N     | N     | N     | N     | N     | N     | P     | 0.3812  |
| ERb_ant (estrogen receptor beta antagonist)                             | N     | N     | P      | P     | P      | P      | P     | P     | P     | P     | P     | P     | P     | P     | 0.4774  |
| RXR_ago (retinoid X receptor-alpha agonist)                             | N     | P     | N      | N     | N      | N      | N     | N     | N     | N     | N     | N     | N     | N     | 0.4933  |
| FXR_ago (farnesoid-X-receptor agonist)                                  | P     | P     | P      | P     | N      | P      | N     | P     | N     | N     | P     | P     | P     | P     | 0.5155  |
| TSHR_ant (thyroid stimulating hormone receptor antagonist)              | N     | P     | P      | P     | P      | P      | P     | N     | P     | P     | N     | P     | P     | N     | 0.5234  |
| ERRPGC_ago (estrogen related receptor with PGC agonist)                 | P     | P     | P      | P     | P      | N      | P     | P     | P     | N     | N     | N     | N     | P     | 0.5461  |
| TGFb_ant (transforming growth factor beta antagonist)                   | P     | P     | P      | N     | P      | N      | P     | P     | P     | N     | P     | P     | P     | P     | 0.5573  |
| CaspH_ind (caspase-3/7 in HepG2 inducer)                                | P     | N     | P      | N     | N      | N      | N     | N     | N     | N     | N     | P     | P     | N     | 0.5673  |
| ERlbd_ago (estrogen receptor alpha lbd agonist)                         | N     | P     | N      | N     | N      | N      | N     | N     | P     | P     | P     | P     | N     | P     | 0.6411  |
| ROR_ant (retinoid-related orphan receptor gamma antagonist)             | P     | P     | P      | P     | P      | P      | P     | P     | P     | N     | N     | P     | P     | P     | 0.6582  |
| PPARd_ant (peroxisome proliferator-activated receptor delta antagonist) | N     | N     | N      | N     | P      | N      | P     | P     | P     | P     | P     | P     | P     | N     | 0.6642  |
| PR_ant (progesterone receptor antagonist)                               | P     | P     | P      | P     | P      | P      | P     | P     | P     | P     | P     | N     | P     | P     | 0.724   |
| ERsr_ago (endoplasmic reticulum stress response agonist)                | P     | N     | P      | P     | P      | P      | P     | P     | P     | P     | P     | N     | P     | P     | 0.8102  |
| ARlbd_ant (androgen receptor lbd antagonist)                            | P     | P     | P      | P     | N      | P      | N     | N     | N     | N     | N     | P     | P     | N     | 0.8227  |
| ERR_ago (estrogen related receptor agonist)                             | P     | P     | P      | P     | P      | P      | P     | P     | P     | N     | N     | N     | N     | P     | 0.8391  |
| MMP_disr (mitochondrial membrane potential disruptor)                   | P     | P     | P      | P     | P      | P      | P     | P     | P     | P     | P     | N     | N     | P     | 0.8582  |
| ARfull_ant (androgen receptor full antagonist)                          | P     | P     | P      | P     | P      | P      | P     | P     | P     | P     | P     | N     | N     | P     | 0.8582  |
| GR_ago (glucocorticoid receptor agonist)                                | N     | N     | N      | P     | N      | N      | N     | N     | P     | N     | N     | N     | N     | N     | 0.8849  |
| HSR_act (heat shock response activator)                                 | N     | P     | N      | N     | P      | P      | P     | P     | P     | N     | N     | N     | N     | N     | 0.8966  |
| CAR_ago (constitutive androstane receptor agonist)                      | P     | P     | P      | P     | P      | P      | P     | P     | P     | P     | P     | P     | N     | P     | 0.9127  |
| ARfulls_ant (androgen receptor with stimulator antagonist)              | P     | P     | P      | P     | P      | P      | P     | P     | P     | P     | P     | P     | N     | P     | 0.9127  |
| ATAD5_ind (ATAD5 genotoxic inducer)                                     | P     | P     | P      | P     | P      | P      | P     | P     | P     | N     | P     | P     | P     | P     | 0.9318  |
| Nfkb_ago (Nfkb agonist)                                                 | N     | N     | N      | N     | N      | N      | N     | N     | N     | P     | N     | N     | N     | N     | 0.9318  |
| Ahr_ago (aryl hydrocarbon receptor agonist)                             | P     | P     | P      | N     | P      | P      | P     | P     | P     | N     | P     | P     | P     | P     | 0.933   |
| AP1_ago (activator protein-1 agonist)                                   | P     | P     | P      | P     | N      | N      | P     | P     | P     | N     | N     | N     | N     | N     | 0.9366  |
| PPARG_ago (peroxisome proliferator-activated receptor gamma agonist)    | P     | P     | P      | N     | N      | N      | N     | P     | N     | N     | N     | N     | P     | P     | 0.9472  |
| p53_ago (p53 agonist)                                                   | P     | P     | P      | P     | P      | P      | P     | P     | P     | P     | P     | P     | P     | P     | -       |
| ARlbd_ago (androgen receptor lbd agonist)                               | N     | N     | N      | N     | N      | N      | N     | N     | N     | N     | N     | N     | N     | N     | -       |
| ERlbd_ant (estrogen receptor alpha lbd antagonist)                      | P     | P     | P      | P     | P      | P      | P     | P     | P     | P     | P     | P     | P     | P     | -       |
| ERfull_ant (estrogen receptor alpha full antagonist)                    | P     | P     | P      | P     | P      | P      | P     | P     | P     | P     | P     | P     | P     | P     | -       |
| Arom_ant (aromatase antagonist)                                         | P     | P     | P      | P     | P      | P      | P     | P     | P     | P     | P     | P     | P     | P     | -       |
| ARE_ago (antioxidant response element agonist)                          | P     | P     | P      | P     | P      | P      | P     | P     | P     | P     | P     | P     | P     | P     | -       |
| PPARd_ago (peroxisome proliferator-activated receptor delta agonist)    | N     | N     | N      | N     | N      | N      | N     | N     | N     | N     | N     | N     | N     | N     | -       |
| FXR_ant (farnesoid-X-receptor antagonist)                               | P     | P     | P      | P     | P      | P      | P     | P     | P     | P     | P     | P     | P     | P     | -       |
| VDR_ago (vitamin D receptor agonist)                                    | N     | N     | N      | N     | N      | N      | N     | N     | N     | N     | N     | N     | N     | N     | -       |
| VDR_ant (vitamin D receptor antagonist)                                 | P     | P     | P      | P     | P      | P      | P     | P     | P     | P     | P     | P     | P     | P     | -       |
| HIF1_ago (hypoxia agonist)                                              | N     | N     | N      | N     | N      | N      | N     | N     | N     | N     | N     | N     | N     | N     | -       |
| ERfulls_ant (estrogen receptor alpha with stimulator antagonist)        | P     | P     | P      | P     | P      | P      | P     | P     | P     | P     | P     | P     | P     | P     | -       |
| Shh_ago (sonic hedgehog signaling agonist)                              | P     | P     | P      | P     | P      | P      | P     | P     | P     | P     | P     | P     | P     | P     | -       |
| ERaant_ago (estrogen receptor alpha with antagonist agonist)            | N     | N     | N      | N     | N      | N      | N     | N     | N     | N     | N     | N     | N     | N     | -       |
| Shh_ant (sonic hedgehog signaling antagonist)                           | P     | P     | P      | P     | P      | P      | P     | P     | P     | P     | P     | P     | P     | P     | -       |
| TSHR_agoant (thyroid stimulating hormone receptor agonist - antagonist) | N     | N     | N      | N     | N      | N      | N     | N     | N     | N     | N     | N     | N     | N     | -       |
| ERb_ago (estrogen receptor beta agonist)                                | N     | N     | N      | N     | N      | N      | N     | N     | N     | N     | N     | N     | N     | N     | -       |
| ERR_ant (estrogen related receptor antagonist)                          | P     | P     | P      | P     | P      | P      | P     | P     | P     | P     | P     | P     | P     | P     | -       |
| PXR_ago (human pregnane X receptor agonist)                             | P     | P     | P      | P     | P      | P      | P     | P     | P     | P     | P     | P     | P     | P     | -       |
| TGFb_ago (transforming growth factor beta agonist)                      | N     | N     | N      | N     | N      | N      | N     | N     | N     | N     | N     | N     | N     | N     | -       |
| PR_ago (progesterone receptor agonist)                                  | N     | N     | N      | N     | N      | N      | N     | N     | N     | N     | N     | N     | N     | N     | -       |
